# Supplementary material for: Novel N-acyloxytrialkylammonium salts as initiators for free radical polymerization of methacrylates
Source: Royal Society of Chemistry journal article supplement (doi:10.1039/b706378b), 2007-01-01
Supplement: b706378b.pdf [file b706378b.pdf]

## Supplementary data

**Preparation, isolation and evaluation of novel N-acyloxytrialkylammonium salts as initiators for free radical polymerization of methacrylates under mildly thermal and accelerant promoted conditions.**

Susan Jansen<sup>\*1</sup>, Yen Wei<sup>\*2</sup>,  
Shuxi Li<sup>2</sup>, Yi Guo<sup>2</sup>, Gregory Pomrink<sup>3</sup>, Hui Lu<sup>3</sup>, Omari E. Ansong<sup>\*1</sup>

<sup>1</sup> Department of Chemistry Temple University, 13<sup>th</sup> and Norris Street,  
Philadelphia, PA 19122

<sup>2</sup> Department of Chemistry, Drexel University, Philadelphia, PA 19104

<sup>3</sup> Research and Development, Dentsply International-Caulk, 38 West Clarke Avenue,  
Milford, DE 19963.

E-mail: Omari Ansong, [ansong@temple.edu](mailto:ansong@temple.edu)  
Susan Jansen, [suebee@temple.edu](mailto:suebee@temple.edu)  
Yen Wei, [weiyen@drexel.edu](mailto:weiyen@drexel.edu)

### Experimental

#### **N-acyloxytrialkylammonium salts**

**1:** N-benzoyloxytriethylammonium tetraphenylborate. Route 1 (Method 1).  
Triethylamine (0.886g, 8.76 mmol), benzoylperoxide (2.12g, 8.76 mmol), sodium tetraphenyl borate (3g, 8.76 mmol), ethanol (50 mL) and toluene (50 mL) were added into a 500 mL one-necked round bottom flask. To the mixture was added a magnetic stirrer. The flask was immersed in ice to which had been added sodium chloride to bring the temperature to  $-5\text{ }^{\circ}\text{C}$ . The reaction mixture was reacted at  $-5\text{ }^{\circ}\text{C}$  for 30 hours. The white precipitate was filtered out and dried under vacuum at room temperature to give 1.52 g of product (33% yield). The product was recrystallized from acetone/water (1:1) mixture. Melting point:  $128\text{ }^{\circ}\text{C}$ . IR (KBr wafer,  $\text{cm}^{-1}$ ): 1770, 1050, 3100, 750. Anal.

Calcd for  $C_{37}H_{40}BNO_2$ : C, 82.1; H, 7.45; N, 2.6; B, 2.06. Found: C, 82.41; H, 7.65; N, 2.63; B, 2.06.

**2:** N-benzoyloxytrimethylammonium tetraphenylborate. Route 2 (Method 2).

Trimethylamine N-oxide (0.3g, 4 mmol), benzoic anhydride (0.9g, 4 mmol), sodium tetraphenyl borate (1.37g, 0.004 mmol), ethanol (50 mL) and toluene (50 mL) were added into a 500 mL one-necked round bottom flask. To the mixture was added a magnetic stirrer. The flask was immersed into dry ice to which had been added carbon tetrachloride to bring the temperature to  $-20\text{ }^\circ\text{C}$ . The reaction mixture was reacted at  $-20\text{ }^\circ\text{C}$  for 4 hours. The white precipitate was filtered out and dried under vacuum at room temperature to give 1.35 g of product (70% yield). The product was recrystallized from acetone/water (1:1) mixture. Melting point:  $138\text{ }^\circ\text{C}$ . IR (KBr wafer,  $\text{cm}^{-1}$ ): 1770, 1050, 3100, 750. Anal. Calcd for  $C_{34}H_{34}BNO_2$ : C, 81.9; H, 6.9; N, 2.87; B, 2.21. Found: C, 82.09; H, 6.97; N, 2.85; B, 2.22.

**3:** N-benzoyloxytrimethylammonium perchlorate.

Trimethylamine N-oxide (3g, 39.6 mmol), benzoic anhydride (9.96g, 39.6 mmol), sodium perchlorate (4.86g, 39.6 mmol), ethanol (50 mL) and toluene (50 mL) were added into a 500 mL one-necked round bottom flask. To the mixture was added a magnetic stirrer. The flask was immersed into dry ice to which had been added carbon tetrachloride to bring the temperature to  $-20\text{ }^\circ\text{C}$ . The reaction mixture was reacted at  $-20\text{ }^\circ\text{C}$  for 4 hours. The white precipitate was filtered out and dried under vacuum at room temperature to give 9.39 g of product (85% yield). The product was recrystallized from acetone/water (1:1) mixture. Melting point:  $166\text{ }^\circ\text{C}$ . IR (KBr wafer,  $\text{cm}^{-1}$ ): 1760, 1050, 3066, 700. Anal. Calcd for  $C_{10}H_{14}NClO_6$ : C, 43; H, 5; N, 5; Cl, 12.5. Found: C, 43.05; H, 5.08; N, 5.02; Cl, 12.52.

**4:** N-butyloxytriethylammonium tetraphenylborate.

Trimethylamine N-oxide (1g, 13.3 mmol), butyric anhydride (2.10g, 13.3 mmol), sodium tetraphenyl borate (4.55 g, 13.3 mmol), ethanol (50 mL) and toluene (50 mL) were added into a 500 mL one-necked round bottom flask. To the mixture was added a

magnetic stirrer. The flask was immersed into dry ice to which had been added carbon tetrachloride to bring the temperature to  $-20\text{ }^{\circ}\text{C}$ . The reaction mixture was reacted at  $-20\text{ }^{\circ}\text{C}$  for 4 hours. The white precipitate was filtered out and dried under vacuum at room temperature to give 4.5 g of product (73% yield). The product was recrystallized from acetone/water (1:1) mixture. Melting point:  $135\text{ }^{\circ}\text{C}$ . IR (KBr wafer,  $\text{cm}^{-1}$ ): 1750, 1050, 3100, 740. Anal. Calcd for  $\text{C}_{31}\text{H}_{36}\text{BNO}_2$ : C, 80; H, 7.35; N, 3.01; B, 2.33. Found: C, 80.24; H, 7.38; N, 3.19; B, 2.25.

**5:** N-propyloxytriethylammonium tetraphenylborate.

Trimethylamine N-oxide (1g, 13.3 mmol), propanoic anhydride (1.731g, 13.3 mmol), sodium tetraphenyl borate (4.55 g, 13.3 mmol), ethanol (50 mL) and toluene (50 mL) were added into a 500 mL one-necked round bottom flask. To the mixture was added a magnetic stirrer. The flask was immersed into dry ice to which had been added carbon tetrachloride chloride to bring the temperature to  $-20\text{ }^{\circ}\text{C}$ . The reaction mixture was reacted at  $-20\text{ }^{\circ}\text{C}$  for 4 hours. The white precipitate was filtered out and dried under vacuum at room temperature to give 4.26g of product (71% yield). The product was recrystallized from acetone/water (1:1) mixture. Melting point:  $134\text{ }^{\circ}\text{C}$ . IR (KBr wafer,  $\text{cm}^{-1}$ ): 1755, 1050, 3100, 740. Anal. Calcd for  $\text{C}_{30}\text{H}_{34}\text{BNO}_2$ : C, 79.86; H, 7.54; N, 3.1; B, 2.4. Found: C, 79.64; H, 7.49; N, 3.10; B, 2.30.

**6:** N-pentyloxytriethylammonium tetraphenylborate.

Trimethylamine N-oxide (1g, 13.3 mmol), pentanoic anhydride (2.48 g, 13.3 mmol), sodium tetraphenyl borate (4.55 g, 13.3 mmol), ethanol (50 mL) and toluene (50 mL) were added into a 500 mL one-necked round bottom flask. To the mixture was added a magnetic stirrer. The flask was immersed into dry ice to which had been added carbon tetrachloride to bring the temperature to  $-20\text{ }^{\circ}\text{C}$ . The reaction mixture was reacted at  $-20\text{ }^{\circ}\text{C}$  for 4 hours. The white precipitate was filtered out and dried under vacuum at room temperature to give 4.14 g of product (65% yield). The product was recrystallized from acetone/water (1:1) mixture. Melting point:  $121\text{ }^{\circ}\text{C}$ . IR (KBr wafer,  $\text{cm}^{-1}$ ): 1750, 1050, 3105, 740. Anal. Calcd for  $\text{C}_{32}\text{H}_{38}\text{BNO}_2$ : C, 80.2; H, 7.94; N, 2.92; B, 2.26. Found: C, 80.38; H, 7.74; N, 2.96; B, 2.24.

**7:** N-lauryloyloxytriethylammonium tetraphenylborate. (Method 1)

Triethylamine (0.886g, 8.76 mmol), lauroyl peroxide (3.49 g, 8.76 mmol), sodium tetraphenyl borate (3g , 8.76 mmol), ethanol (50 mL) and toluene (50 mL) were added into a 500 mL one-necked round bottom flask. To the mixture was added a magnetic stirrer. The flask was immersed into ice to which had been added sodium chloride to bring the temperature to  $-5\text{ }^{\circ}\text{C}$ . The reaction mixture was reacted at  $-5\text{ }^{\circ}\text{C}$  for 4 hours. The white precipitate was filtered out and dried under vacuum at room temperature to give 3.19 g of product (60% yield). The product was recrystallized from acetone/water (1:1) mixture. Melting point:  $205\text{ }^{\circ}\text{C}$ . IR (KBr wafer,  $\text{cm}^{-1}$ ): 1760, 1050, 3105, 740. Anal. Calcd for  $\text{C}_{42}\text{H}_{58}\text{BNO}_2$ : C, 81.45; H, 9.37; N, 2.26; B, 1.75. Found: C, 81.38; H, 9.34; N, 2.28; B, 1.74.

**8:** N-acetoxytrimethylammonium tetraphenylborate.

Trimethylamine N-oxide (1g, 13.3 mmol), acetic anhydride (1.386 g, 13.3 mmol), sodium tetraphenyl borate (4.55g , 13.3 mmol), ethanol (50 mL) and toluene (50 mL) were added into a 500 mL one-necked round bottom flask. To the mixture was added a magnetic stirrer. The flask was immersed into dry ice to which had been added carbon tetrachloride to bring the temperature to  $-20\text{ }^{\circ}\text{C}$ . The reaction mixture was reacted at  $-20\text{ }^{\circ}\text{C}$  for 4 hours. The white precipitate was filtered out and dried under vacuum at room temperature to give 4.6 g of product (79% yield). The product was recrystallized from acetone/water (1:1) mixture. Melting point:  $170\text{ }^{\circ}\text{C}$ . IR (KBr wafer,  $\text{cm}^{-1}$ ): 1765, 1050, 3105, 740. Anal. Calcd for  $\text{C}_{29}\text{H}_{32}\text{BNO}_2$ : C, 79.67; H, 7.33; N, 3.21; B, 2.47. Found: C, 79.69; H, 7.33; N, 3.28; B, 2.51.

**9:** N-benzoyloxy, N-(4-methylmorpholinyl)ammonium tetraphenylborate.

4-methylmorpholine N-oxide (1.61g, 13.3 mmol), benzoic anhydride (3.34 g, 13.3 mmol), sodium tetraphenyl borate (4.55g, 13.3 mmol), ethanol (50 mL) and toluene (50 mL) were added into a 500 mL one-necked round bottom flask. To the mixture was added a magnetic stirrer. The flask was immersed into dry ice to which had been added carbon tetrachloride to bring the temperature to  $-20\text{ }^{\circ}\text{C}$ . The reaction mixture was reacted at  $-20\text{ }^{\circ}\text{C}$  for 4 hours. The white precipitate was filtered out and dried under vacuum at

room temperature to give 5.1 g of product (71% yield). The product was recrystallized from acetone/water (1:1) mixture. Melting point: 124 °C. IR (KBr wafer,  $\text{cm}^{-1}$ ): 1770, 1050, 3100, 740. Anal. Calcd for  $\text{C}_{36}\text{H}_{36}\text{BNO}_3$ : C, 79.88; H, 6.66; N, 2.59; B, 2.00. Found: C, 79.81; H, 6.65; N, 2.6; B, 2.05.
